# Supplementary material for: Visible/infrared light-driven high-efficiency CO2conversion into ethane based on a B–Co synergistic catalyst
Source: Royal Society of Chemistry journal article supplement (doi:10.1039/d0ta05821a), 2020-01-01
Supplement: d0ta05821a1.pdf [file d0ta05821a1.pdf]

## Supporting Information

# Visible/Infrared Light-Driven High-efficiency CO<sub>2</sub> conversion into Ethane based on B-Co Synergistic Catalyst

Lei Li,<sup>1,2,3,#</sup> Haoran Guo,<sup>4,#</sup> Ge Yao,<sup>5</sup> Chenhui Hu,<sup>6</sup> Chunhong Liu,<sup>6</sup> Ziqi Tian,<sup>1,3</sup>  
Baihai Li,<sup>\*,2</sup> Qiuju Zhang,<sup>\*,1,3</sup> Liang Chen<sup>\*,1,3</sup>

<sup>1</sup>Ningbo Institute of Materials Technology and Engineering, Chinese Academy of Sciences,  
Ningbo 315201, Zhejiang, China

<sup>2</sup>School of Materials and Energy, University of Electronic Science and Technology of China,  
Chengdu 611731, Sichuan, China

<sup>3</sup>School of Chemical Sciences, University of Chinese Academy of Sciences, Beijing, 100049,  
China

<sup>4</sup>University of Chinese Academy of Sciences, 100049, Beijing, China

<sup>5</sup> School of Physics, Collaborative Innovation Center of Advanced Microstructures, and  
National Laboratory of Solid State Microstructures, Nanjing University, Nanjing 210093,  
Jiangsu, China.

<sup>6</sup>Zhejiang Provincial Key Laboratory of Energy Conservation & Pollutant Control  
Technology for Thermal Power, Hangzhou 311121, Zhejiang, China.

<sup>#</sup>These authors contributed equally

Email: libaihai@uestc.edu.cn; tianziqi@nimte.ac.cn; chenliang@nimte.ac.cn

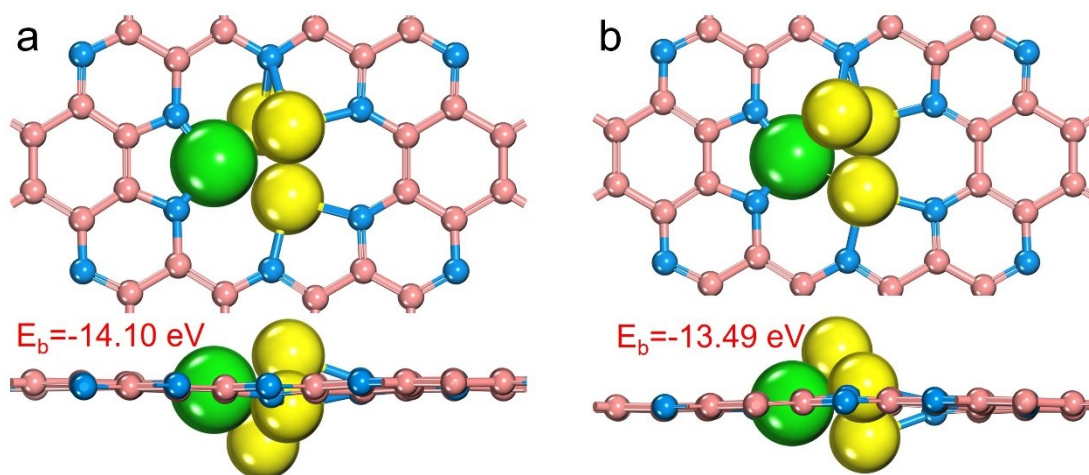

**Figure S1.** Two possible  $\text{BCo}_3@C_2N$  configurations, where the green and yellow present B and Co atoms, respectively.

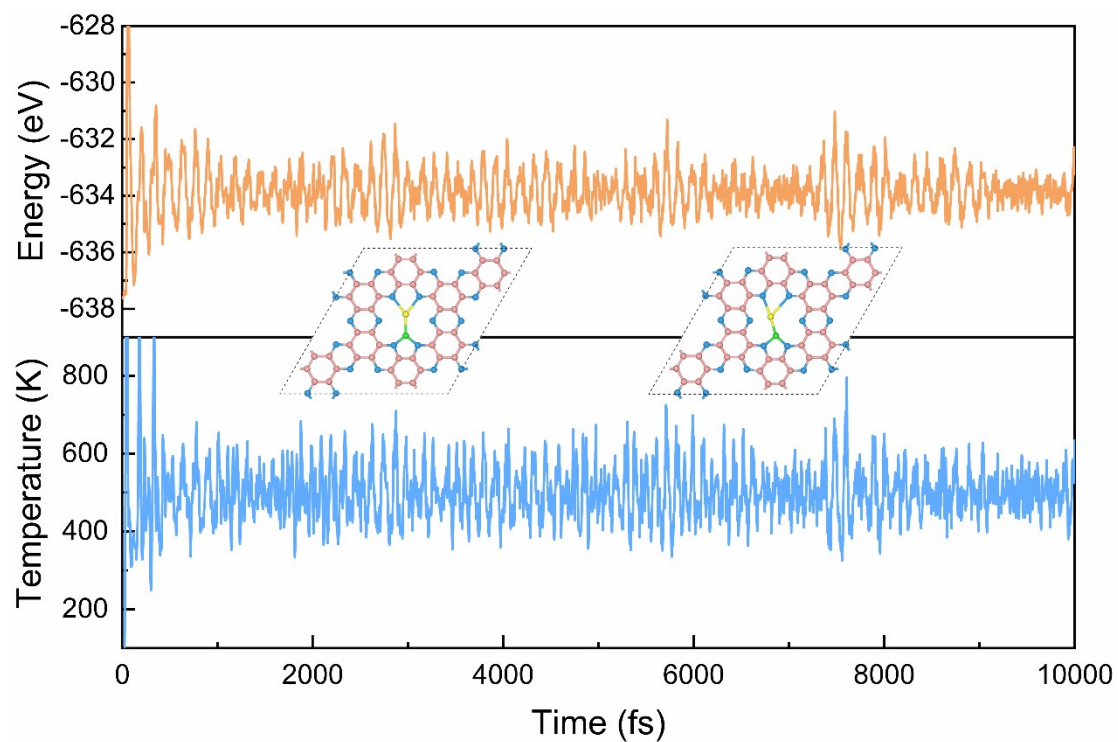

**Figure S2.** Fluctuation of temperature and energy with respect to the time for AIMD simulations of B-Co@C<sub>2</sub>N under 500 K temperature and 2fs time step. The snapshots at the beginning and the end of the trajectory are also shown. The C, N, B, and Co atoms were presented in pink, blue, green and yellow, respectively.

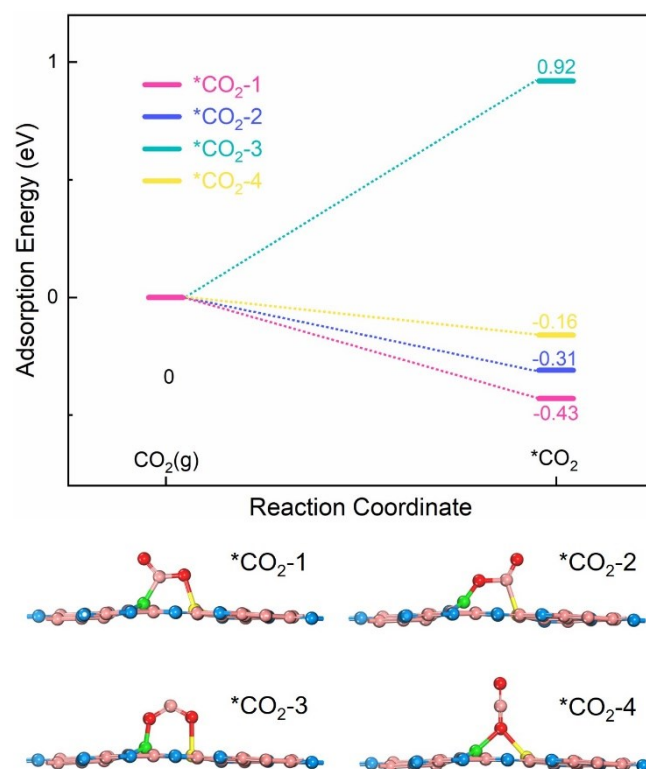

**Figure S3.** CO<sub>2</sub> adsorption energies of four possible initial CO<sub>2</sub> adsorption configurations on B-Co@C<sub>2</sub>N.

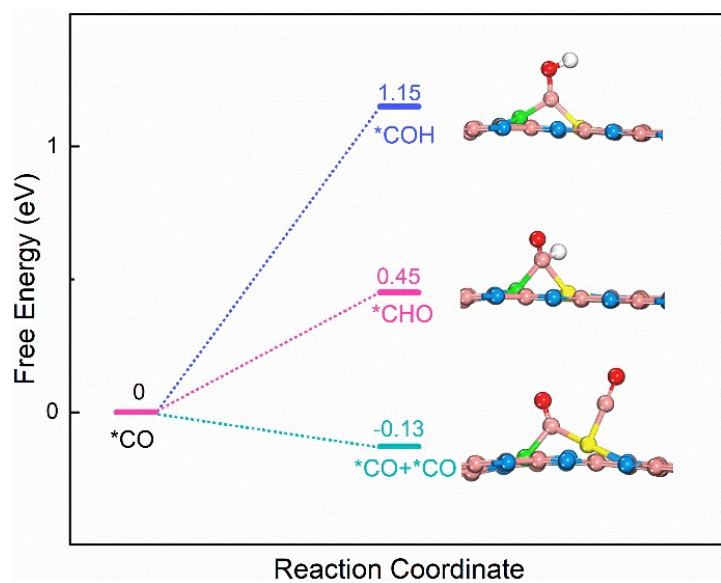

**Figure S4.** The free energy changes for the further reaction of adsorbed CO molecule.

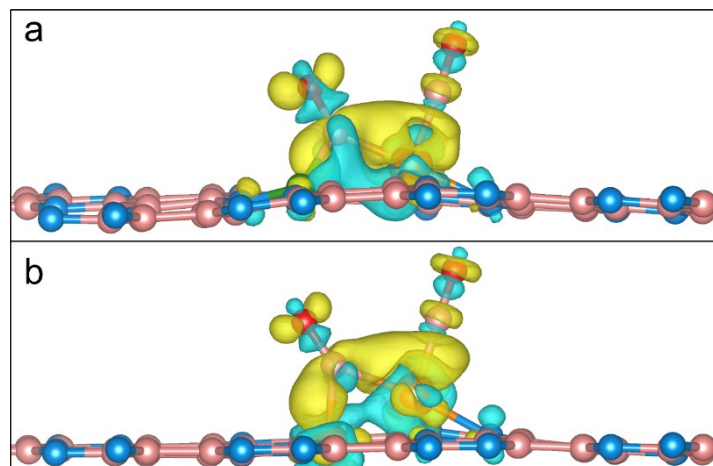

**Figure S5.** The charge density differences of adsorbed two CO molecules on (a) B-Co@C<sub>2</sub>N and (b) Co-Co@C<sub>2</sub>N, where the isosurface level is set to 0.005 e/Å<sup>3</sup>. Yellow and blue isosurfaces are represented as electron donation and accumulation, respectively.

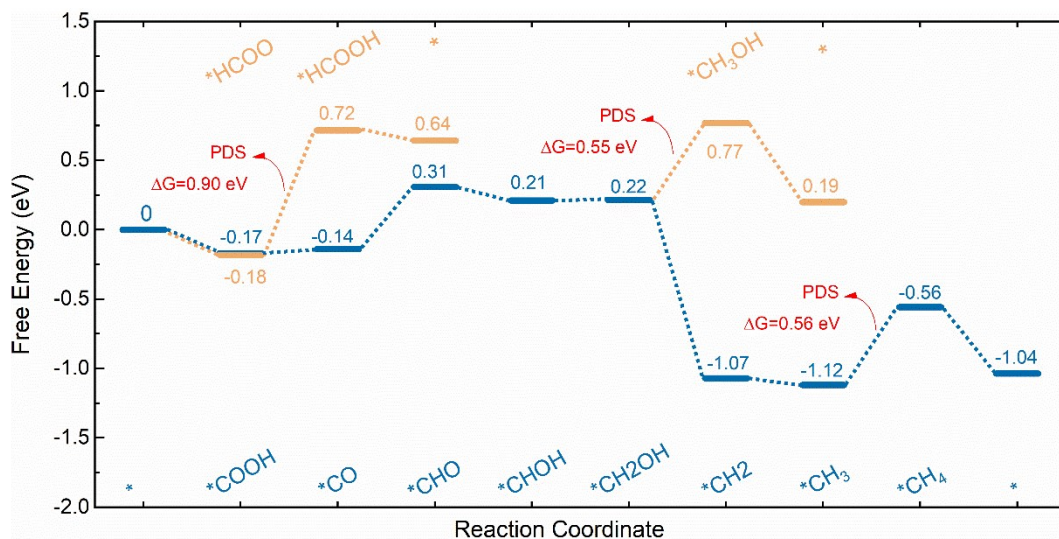

**Figure S6.** Free energy profiles for CO<sub>2</sub>RR toward C<sub>1</sub> products along various possible routes.

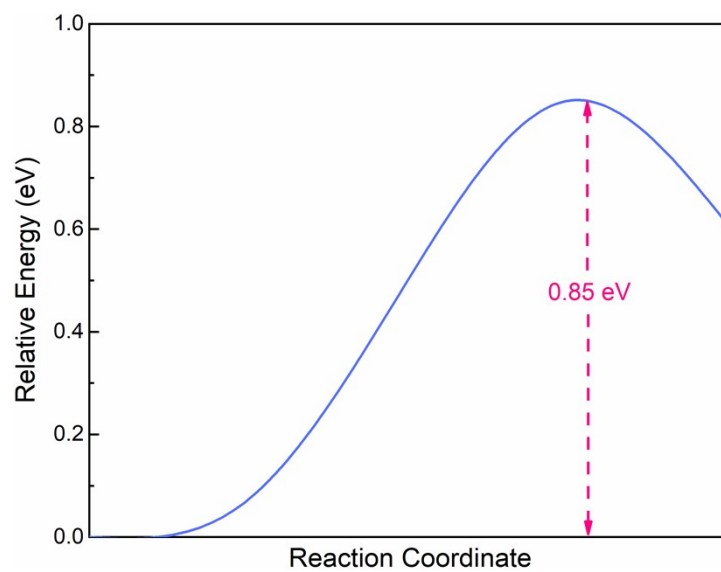

**Figure S7.** The calculated C-C coupling reaction barrier on B-Co@C<sub>2</sub>N through CINEB method.



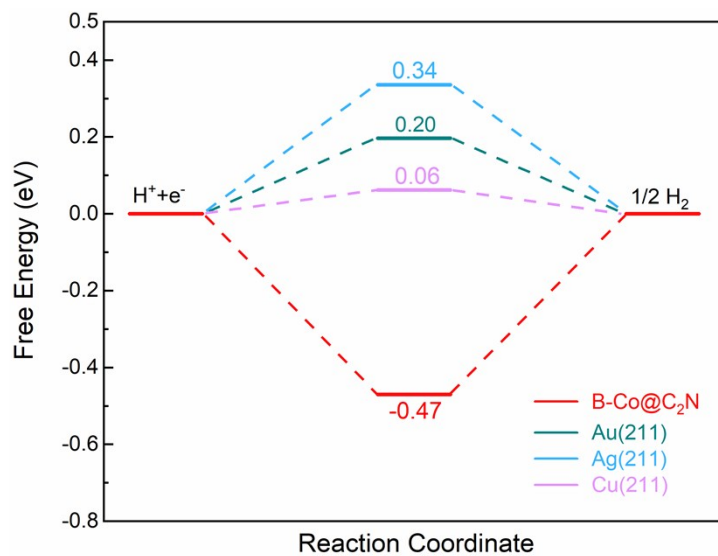

**Figure S8.** The calculated HER free energy of B-Co@C<sub>2</sub>N, Au (211), Ag (211), and Cu (211).

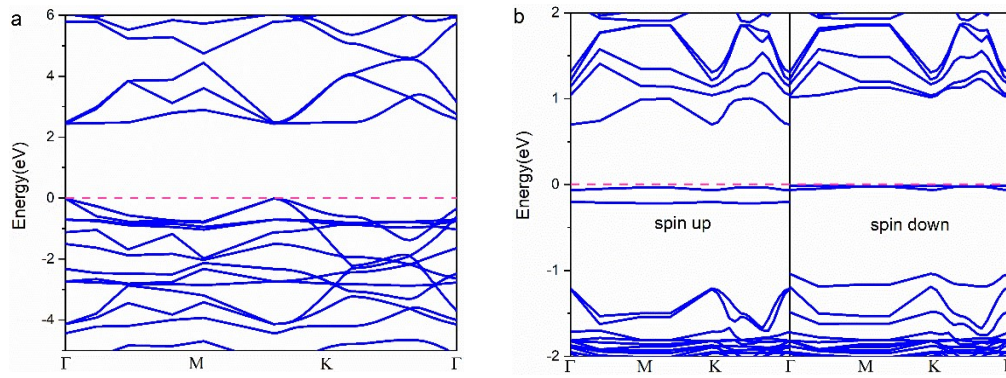

**Figure S9.** Band structures of (a) pristine C<sub>2</sub>N and (b) B-Co@C<sub>2</sub>N, where the Fermi levels are set to zero and represented by pink dash lines.

**Table S1** Calculated ZPE and TS energies for different species, where the label \* denotes the status of adsorption.

| <b>Adsorbed species</b>              | <b><math>E_{\text{ZPE}}</math> (eV)</b> | <b><math>E_{\text{TS}}</math> (eV)</b> |
|--------------------------------------|-----------------------------------------|----------------------------------------|
| <b>CO</b>                            | 0.14                                    | 0.62                                   |
| <b>H<sub>2</sub></b>                 | 0.27                                    | 0.41                                   |
| <b>H<sub>2</sub>O</b>                | 0.60                                    | 0.59                                   |
| <b>C<sub>2</sub>H<sub>4</sub></b>    | 1.39                                    | 0.69                                   |
| <b>C<sub>2</sub>H<sub>5</sub>OH</b>  | 2.14                                    | 0.85                                   |
| <b>C<sub>2</sub>H<sub>6</sub></b>    | 1.99                                    | 0.69                                   |
| <b>*COOH</b>                         | 0.66                                    | 0.18                                   |
| <b>*CO</b>                           | 0.20                                    | 0.14                                   |
| <b>*2CO</b>                          | 0.42                                    | 0.29                                   |
| <b>*COCO</b>                         | 0.41                                    | 0.26                                   |
| <b>*COCHO</b>                        | 0.74                                    | 0.24                                   |
| <b>*COCHOH</b>                       | 1.07                                    | 0.22                                   |
| <b>*COHCHOH</b>                      | 1.39                                    | 0.23                                   |
| <b>*CHCOH</b>                        | 0.94                                    | 0.15                                   |
| <b>*CHCHOH</b>                       | 1.20                                    | 0.17                                   |
| <b>*CHC</b>                          | 0.53                                    | 0.09                                   |
| <b>*CH<sub>2</sub>CHOH</b>           | 1.55                                    | 0.19                                   |
| <b>*CHCH</b>                         | 0.80                                    | 0.10                                   |
| <b>*CH<sub>3</sub>CHOH</b>           | 1.84                                    | 0.27                                   |
| <b>*CHCH<sub>2</sub></b>             | 1.16                                    | 0.11                                   |
| <b>*C<sub>2</sub>H<sub>5</sub>OH</b> | 2.14                                    | 0.34                                   |
| <b>*C<sub>2</sub>H<sub>4</sub></b>   | 1.44                                    | 0.13                                   |
| <b>*C<sub>2</sub>H<sub>5</sub></b>   | 1.74                                    | 0.17                                   |
| <b>*C<sub>2</sub>H<sub>6</sub></b>   | 2.01                                    | 0.29                                   |
